# Supplementary material for: Lavender-like cobalt hydroxide nanoflakes deposited on nickel nanowire arrays for high-performance supercapacitors
Source: Royal Society of Chemistry journal article supplement (doi:10.1039/c8ra02844c), 2018-01-01
Supplement: c8ra02844c1.pdf [file c8ra02844c1.pdf]

## Supporting information

# Lavender-like cobalt hydroxide nanoflakes deposited on nickel nanowire arrays for high-performance supercapacitors

Jie Liao,<sup>a</sup> Xuanyu Wang,<sup>a</sup> Yang Wang,<sup>a</sup> Songyang Su,<sup>a</sup> Adeela Nairan,<sup>a</sup> Feiyu Kang,<sup>a, b</sup> and Cheng Yang\*<sup>a</sup>

<sup>a</sup>Division of Energy and Environment, Graduate School at Shenzhen, Tsinghua University, Shenzhen, 518055, China.

<sup>b</sup>School of Materials Science and Engineering, Tsinghua University, Beijing 100084, China.

Corresponding Author: yang.cheng@sz.tsinghua.edu.cn

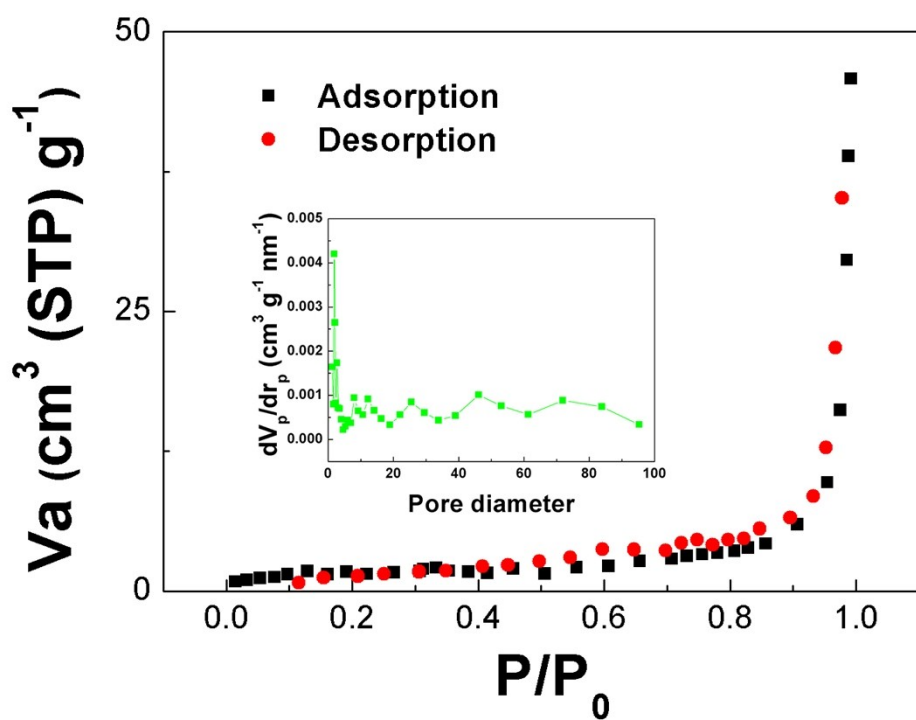

**Figure S1.** Nitrogen adsorption-desorption isotherm of the NFCOH sample, the inset showing the pore-size distribution.

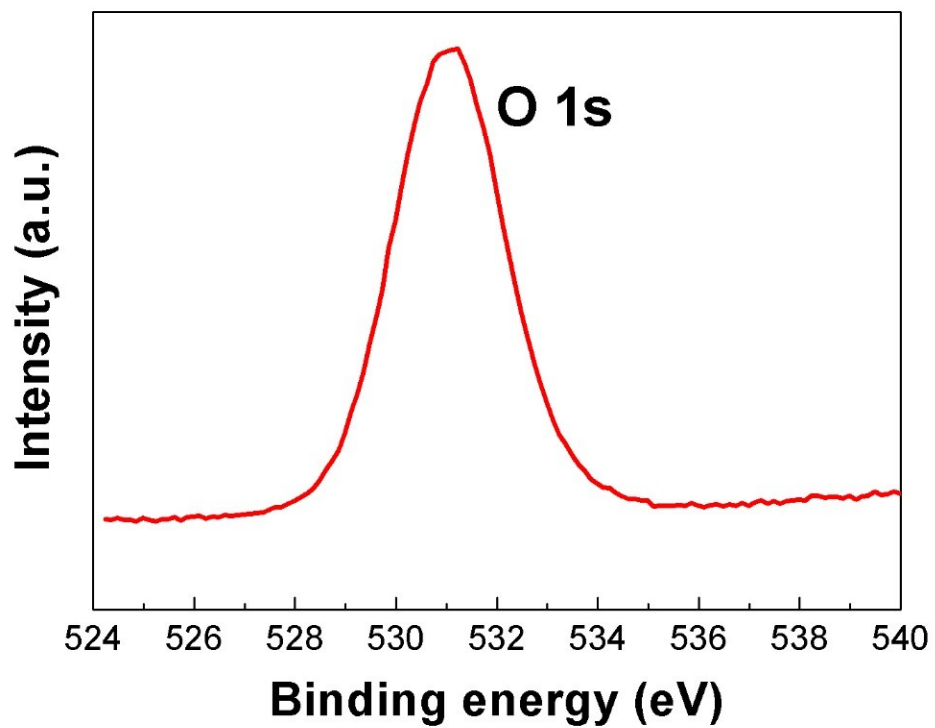

**Figure S2.** X-ray photon spectrum of O1s of the NNA@Co(OH)<sub>2</sub> sample.

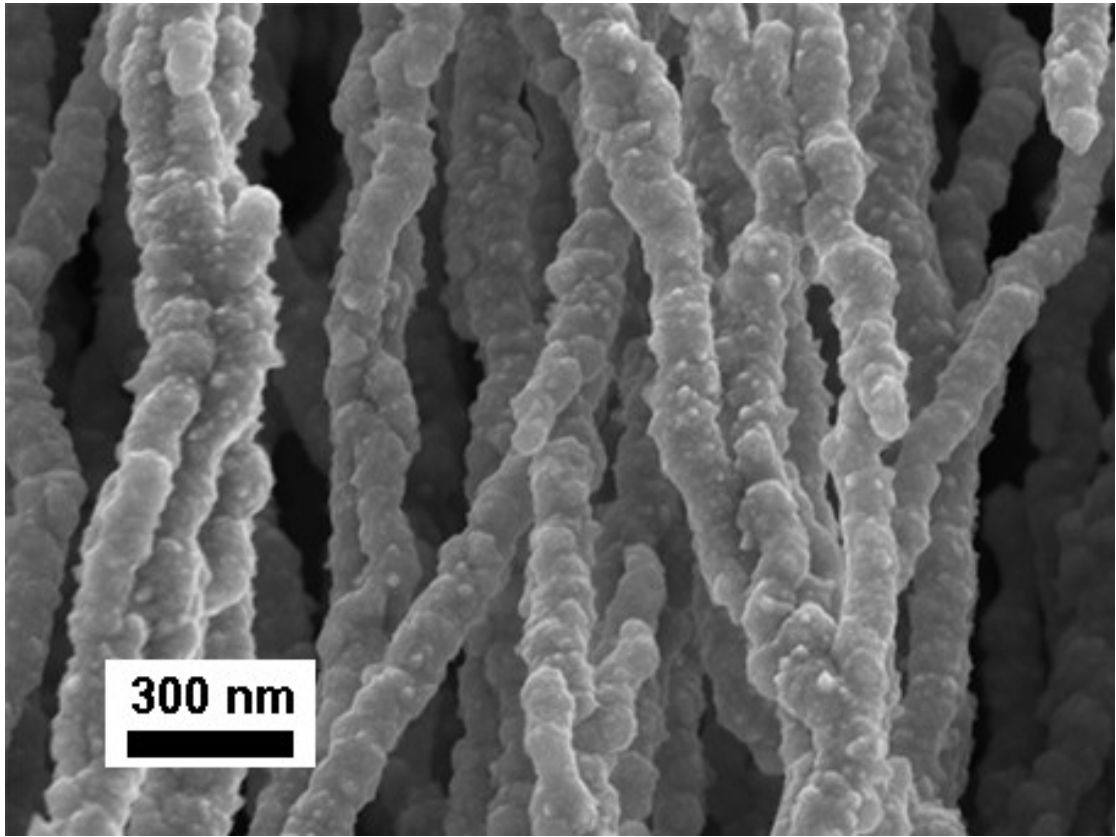

**Figure S3.** SEM image of the pristine nickel nanowire arrays.

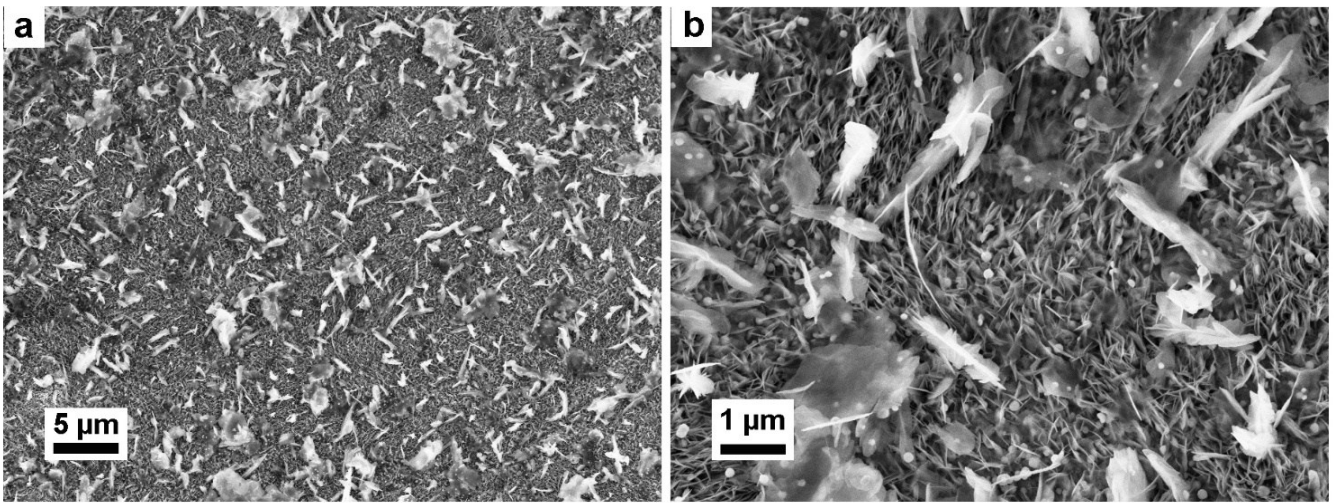

**Figure S4.** SEM image of nickel foam@Co(OH)<sub>2</sub> at different magnifications.

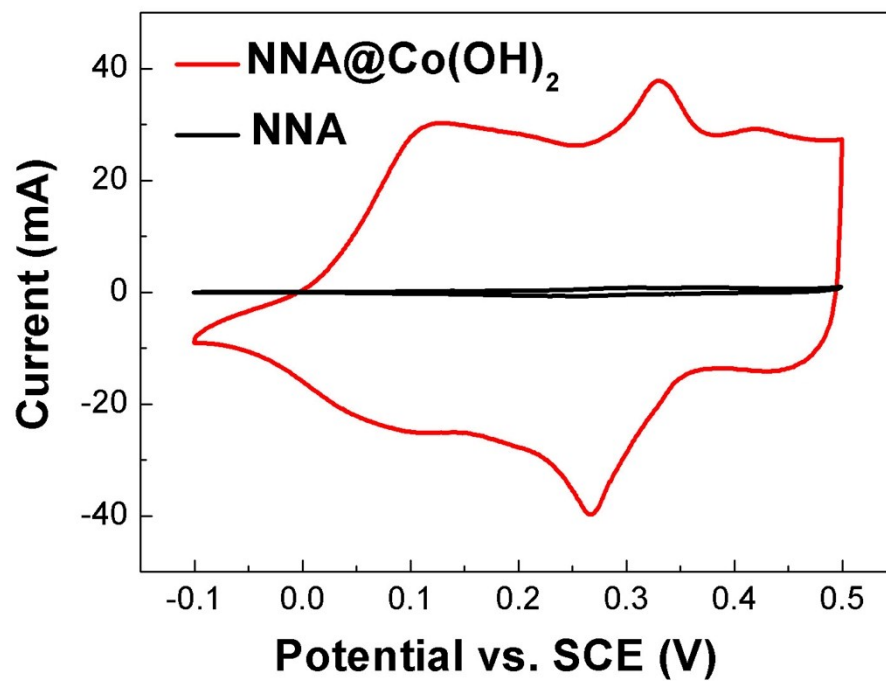

**Figure S5.** Cyclic voltammetry of the NNA@Co(OH)<sub>2</sub> electrode and NNA at the current density of 5 mV s<sup>-1</sup>.

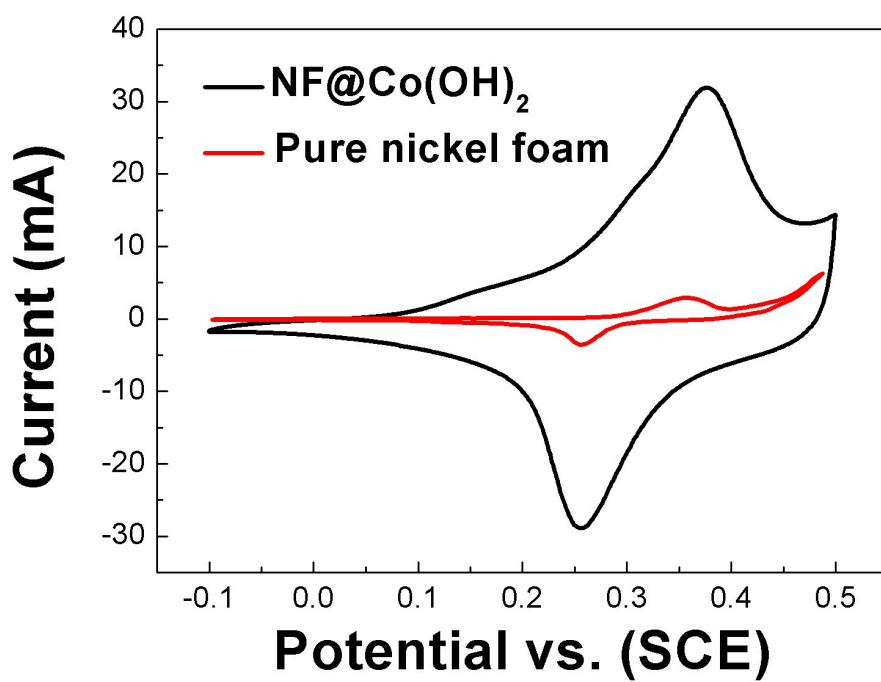

**Figure S6.** Cyclic voltammetry of the NF@Co(OH)<sub>2</sub> electrode and pure nickel foam at the current density of 5 mV s<sup>-1</sup>.

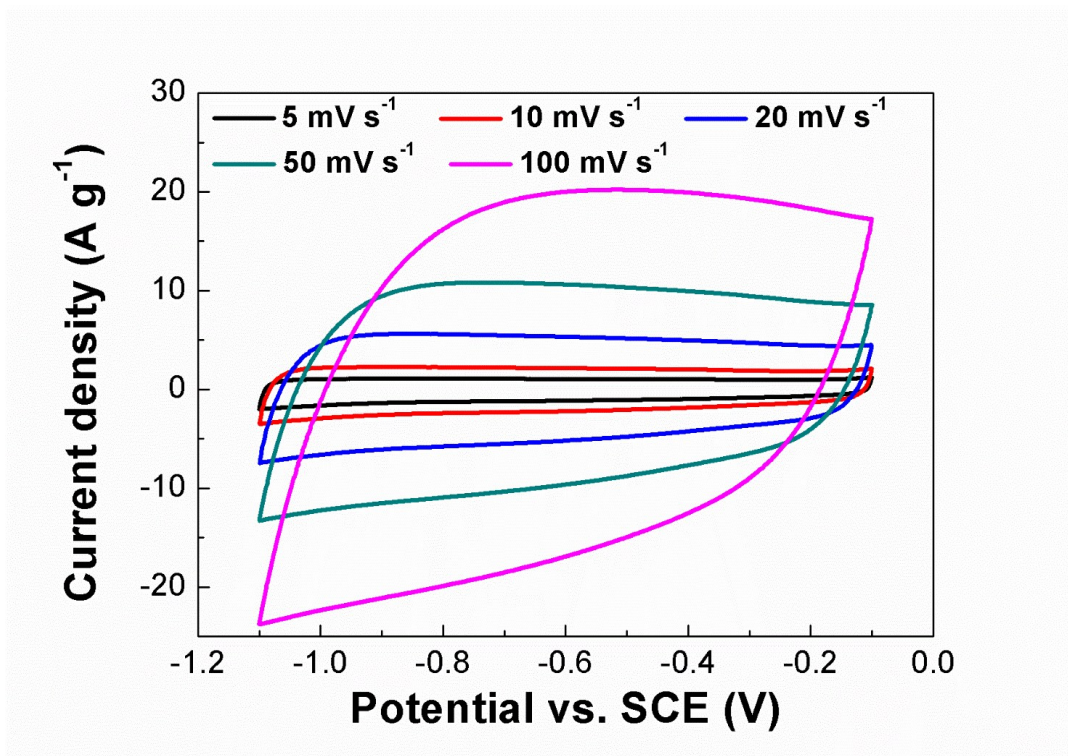

**Figure S7.** Cyclic voltammety plot of the activated carbon electrode at the scan rate from 5 to 100  $\text{mV s}^{-1}$ .



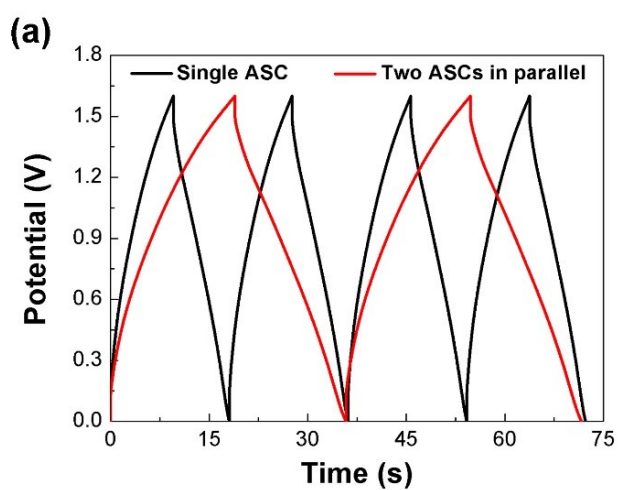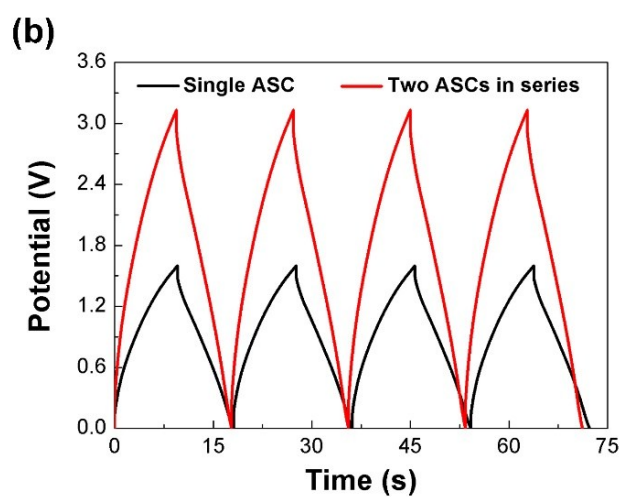

**Figure S8.** Galvanostatic charge/discharge curves of: a) a single asymmetric supercapacitor (ASC) and two ASCs in parallel, and b) a single ASC and two ASCs in tandem.

**Table S1.** Electrochemical performances of Co(OH)<sub>2</sub> based electrodes from recent reports.

| Ref       | Morphology                                         | Capacitance at current density                                                                        | Cycling stability         | Energy density at Power density                                                                                  |
|-----------|----------------------------------------------------|-------------------------------------------------------------------------------------------------------|---------------------------|------------------------------------------------------------------------------------------------------------------|
| This work | Co(OH) <sub>2</sub> nanosheets on nickel nanowire  | 891.2 F/g at 1 A/g,<br>721 F/g at 50 A/g.                                                             | 89.3% after 20,000 cycles | 23.1 Wh kg <sup>-1</sup> at 712 W kg <sup>-1</sup> ,<br>13.5 Wh kg <sup>-1</sup> at 14.7 kW kg <sup>-1</sup> .   |
| 1         | Co(OH) <sub>2</sub> nanowires                      | 358 F/g at 0.5 A/g,<br>325 F/g at 10 A/g.                                                             | 86.3% after 5,000 cycles  | 13.6 Wh kg <sup>-1</sup> at 153 W kg <sup>-1</sup> ,<br>13.1 Wh kg <sup>-1</sup> at 1.88 kW kg <sup>-1</sup> .   |
| 2         | Co(OH) <sub>2</sub> arrays on carbon nanotube foam | 614 C/g at 0.5 A/g,<br>425 C/g at 10 A/g.                                                             | none                      | 13.3 Wh kg <sup>-1</sup> at 612 W kg <sup>-1</sup> ,<br>6.1 Wh kg <sup>-1</sup> at 7.2 kW kg <sup>-1</sup> .     |
| 3         | Flower-like Co(OH) <sub>2</sub>                    | 429 F/g at 1 A/g,<br>337 F/g at 10 A/g.                                                               | >80% after 4,000 cycles   | 22 Wh kg <sup>-1</sup> ,<br>9 Wh kg <sup>-1</sup> at 15.9 kW kg <sup>-1</sup> .                                  |
| 4         | Co(OH) <sub>2</sub> /graphene                      | 693.8 F/g at 2 A/g,<br>506.2 F/g at 32 A/g.                                                           | 91.9% after 3,000 cycles  | 19.3 Wh kg <sup>-1</sup> at 187.5 W kg <sup>-1</sup> ,<br>16.7 Wh kg <sup>-1</sup> at 3,000 W kg <sup>-1</sup> . |
| 5         | Co(OH) <sub>2</sub> nanosheets                     | 604 F/g at 5 mV/s,<br>454 F/g at 50 mV/s.                                                             | 76% after 500 cycles      | none                                                                                                             |
| 6         | Co(OH) <sub>2</sub> sheets                         | 885 F/g at 1 A/g,<br>699 F/g at 10 A/g.                                                               | 91% after 1,500 cycles    | none                                                                                                             |
| 7         | Co(OH) <sub>2</sub> nanocone                       | 562 F/g at 2 A/g,<br>377 F/g at 32 A/g.                                                               | 97% after 5,000 cycles    | none                                                                                                             |
| 8         | Co@Co(OH) <sub>2</sub> core-shell structure        | 525 F/g at 0.5 A/g,<br>396 F/g at 2 A/g.                                                              | 81.5% after 3,000 cycles  | none                                                                                                             |
| 9         | Graphene/Co(OH) <sub>2</sub>                       | 474 F/g at 1 A/g,<br>300 F/g at 10 A/g.                                                               | 90% after 1,000 cycles    | none                                                                                                             |
| 10        | Co(OH) <sub>2</sub> on nickel foam                 | 3.17 F/cm <sup>2</sup> at 5 mA/cm <sup>2</sup> .                                                      | 303% after 2,000 cycles   | none                                                                                                             |
| 11        | Co(OH) <sub>2</sub> nanowires                      | 1.44 F/cm <sup>2</sup> at 1 mA/cm <sup>2</sup> ,<br>0.99 F/cm <sup>2</sup> at 10 mA/cm <sup>2</sup> . | 93.6% after 5,000 cycles  | none                                                                                                             |

## References:

1. Y. Tang, Y. Liu, S. Yu, S. Mu, S. Xiao, Y. Zhao and F. Gao, *J. Power Sources*, 2014, **256**, 160-169.
2. C. Wang, H. Qu, T. Peng, K. Mei, Y. Qiu, Y. Lu, Y. Luo and B. Yu, *Electrochim. Acta*, 2016, **191**, 133-141.
3. R. Wang, X. Yan, J. Lang, Z. Zheng and P. Zhang, *J. Mater. Chem. A*, 2014, **2**, 12724-12732.
4. C. Zhao, F. Ren, X. Xue, W. Zheng, X. Wang and L. Chang, *J. Electroanal. Chem.*, 2016, **782**, 98-102.
5. T. Zhao, H. Jiang and J. Ma, *J. Power Sources*, 2011, **196**, 860-864.
6. P. Dai, T. Yan, L. Hu, Z. Pang, Z. Bao, M. Wu, G. Li, J. Fang and Z. Peng, *J. Mater. Chem. A*, 2017, **5**, 19203-19209.
7. F. Cao, G. X. Pan, P. S. Tang and H. F. Chen, *J. Power Sources*, 2012, **216**, 395-399.
8. Y. K. Kim, S. I. Cha and S. H. Hong, *J. Mater. Chem. A*, 2013, **1**, 9802.
9. Z. Li, J. Wang, L. Niu, J. Sun, P. Gong, W. Hong, L. Ma and S. Yang, *J. Power Sources*, 2014, **245**, 224-231.
10. Z. Yu, Z. Cheng, X. Wang, S. X. Dou and X. Kong, *J. Mater. Chem. A*, 2017, **5**, 7968-7978.
11. D. Yu, Y. Wang, L. Zhang, Z.-X. Low, X. Zhang, F. Chen, Y. Feng and H. Wang, *Nano Energy*, 2014, **10**, 153-162.
